# Supplementary material for: Effect of Arginine Vasopressin on Intraoperative Hypotension Caused by Oral Administration of 5-Aminolevulinic Acid
Source: Hindawi journal article supplement (doi:10.1155/2023/1745373), 2023-05-06

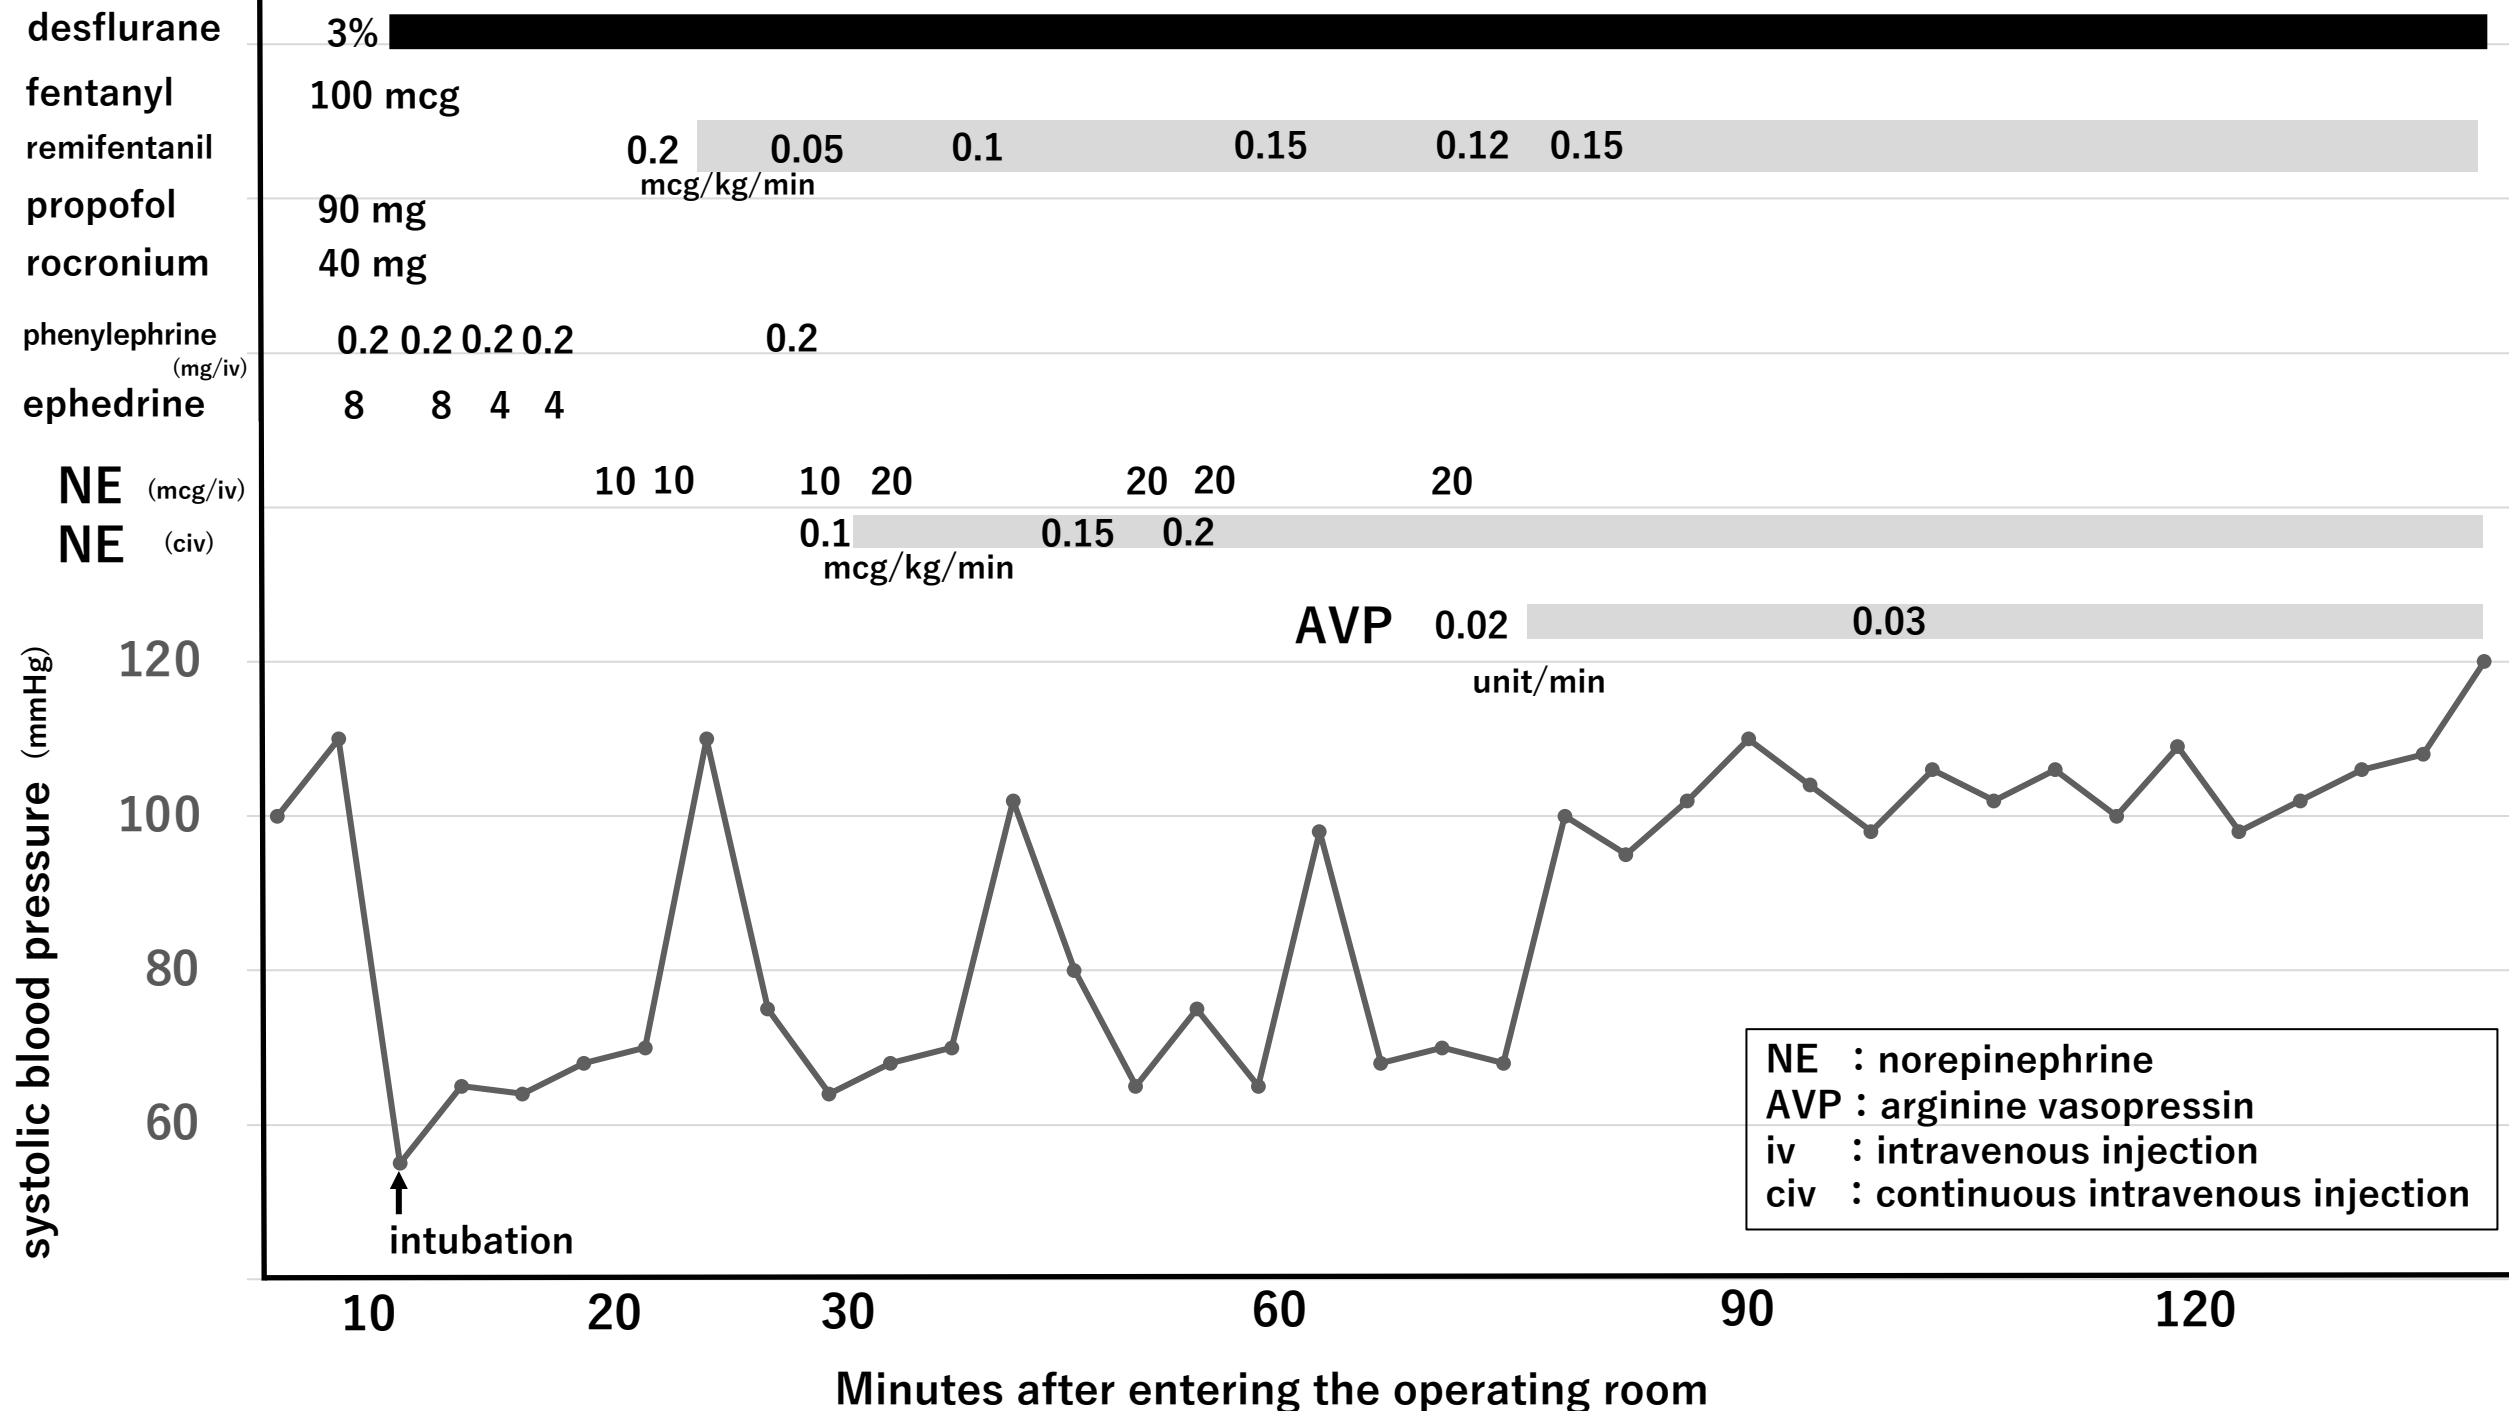

Supplement: f1 [file 1745373.f1.pdf]
